# Supplementary material
Source: MDPI journal article supplement (https://www.mdpi.com/2311-7524/6/1/9)
Supplement: s1 [file s1]

**Table S1.** Plant-growth parameters of fast-growing, medium-growing, and slow-growing crops measured at day 0.

| Crop type                    | Flow rate | Plant height<br>(cm) | Leaf number<br>(n/plant) | Total fresh<br>weight<br>(g/plant) | SPAD | Leaf length<br>(cm) |
|------------------------------|-----------|----------------------|--------------------------|------------------------------------|------|---------------------|
| Fast-growing                 | High      | 7.3                  | 4.5                      | 17.1                               | 23.3 | 11.6                |
|                              | Medium    | 6.8                  | 4.4                      | 17.1                               | 22.5 | 12.4                |
|                              | Low       | 7.0                  | 4.6                      | 17.0                               | 23.0 | 11.8                |
|                              |           | ns                   | ns                       | ns                                 | ns   | ns                  |
| Medium-growing               | High      | 12.6                 | 3.5                      | 17.6                               | 30.6 | 17.3                |
|                              | Medium    | 12.2                 | 3.2                      | 17.6                               | 29.4 | 15.7                |
|                              | Low       | 11.0                 | 3.5                      | 17.5                               | 28.8 | 14.4                |
|                              |           | ns                   | ns                       | ns                                 | ns   | ns                  |
| Slow-growing                 | High      | 8.1                  | 5.5                      | 17.7                               | 32.6 | 6.9                 |
|                              | Medium    | 10.7                 | 8.1                      | 19.3                               | 30.5 | 7.4                 |
|                              | Low       | 8.8                  | 6.1                      | 18.2                               | 30.8 | 6.8                 |
|                              |           | ns                   | ns                       | ns                                 | ns   | ns                  |
| Significance                 |           |                      |                          |                                    |      |                     |
| Crop type                    |           | ***                  | ***                      | ***                                | ***  | ***                 |
| Flow rate                    |           | ns                   | ns                       | ns                                 | ns   | ns                  |
| Crop type $\times$ Flow rate |           | ns                   | ns                       | ns                                 | ns   | ns                  |

Each value in the table is the average of 2 crop species for fast-growing (Chinese cabbage, lettuce), medium-growing (mustard, chia), and slow-growing (basil, Swiss chard) crops, respectively. Each crop species consisted of 12 replicates.

ns, \*, \*\*, \*\*\* mean no significant or significant at  $p \leq 0.05$ , 0.01, or 0.001, respectively.
